# Supplementary material for: Hydrophobic perovskites based on an alkylamine compound for high efficiency solar cells with improved environmental stability
Source: Royal Society of Chemistry journal article supplement (doi:10.1039/c9ta01569h), 2019-01-01
Supplement: c9ta01569h1.pdf [file c9ta01569h1.pdf]

## Supporting Information

### **Hydrophobic Perovskite based on an Alkylamine Compound for High Efficiency Solar Cells with Improved Environmental Stability**

**Mi-Hee Jung<sup>\*,†</sup>**

□Department of Nanotechnology and Advanced Materials Engineering, Sejong University, 209, Neungdong-ro, Gwangjin-gu, Seoul 05006, Republic of Korea; Fax: +82-2-3408-4342; Tel: +82-2-6935-2443; E-mail: [mhjung@sejong.ac.kr](mailto:mhjung@sejong.ac.kr)

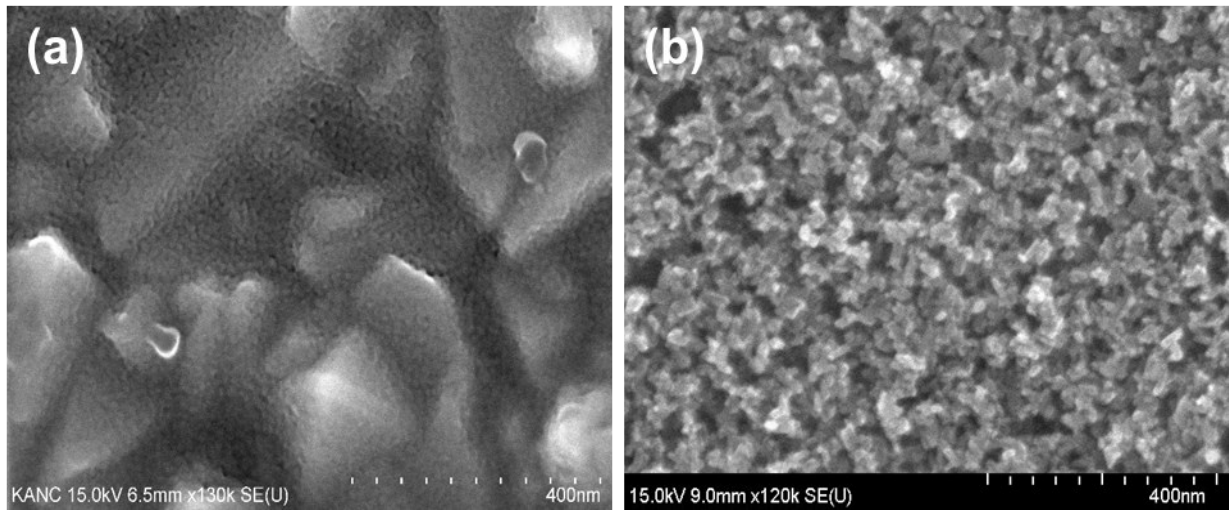

**Figure S1.** (a)  $\text{TiO}_2$  blocking layer on FTO glass and (b)  $\text{TiO}_2$  mesoporous layer on the  $\text{TiO}_2$  blocking layer.

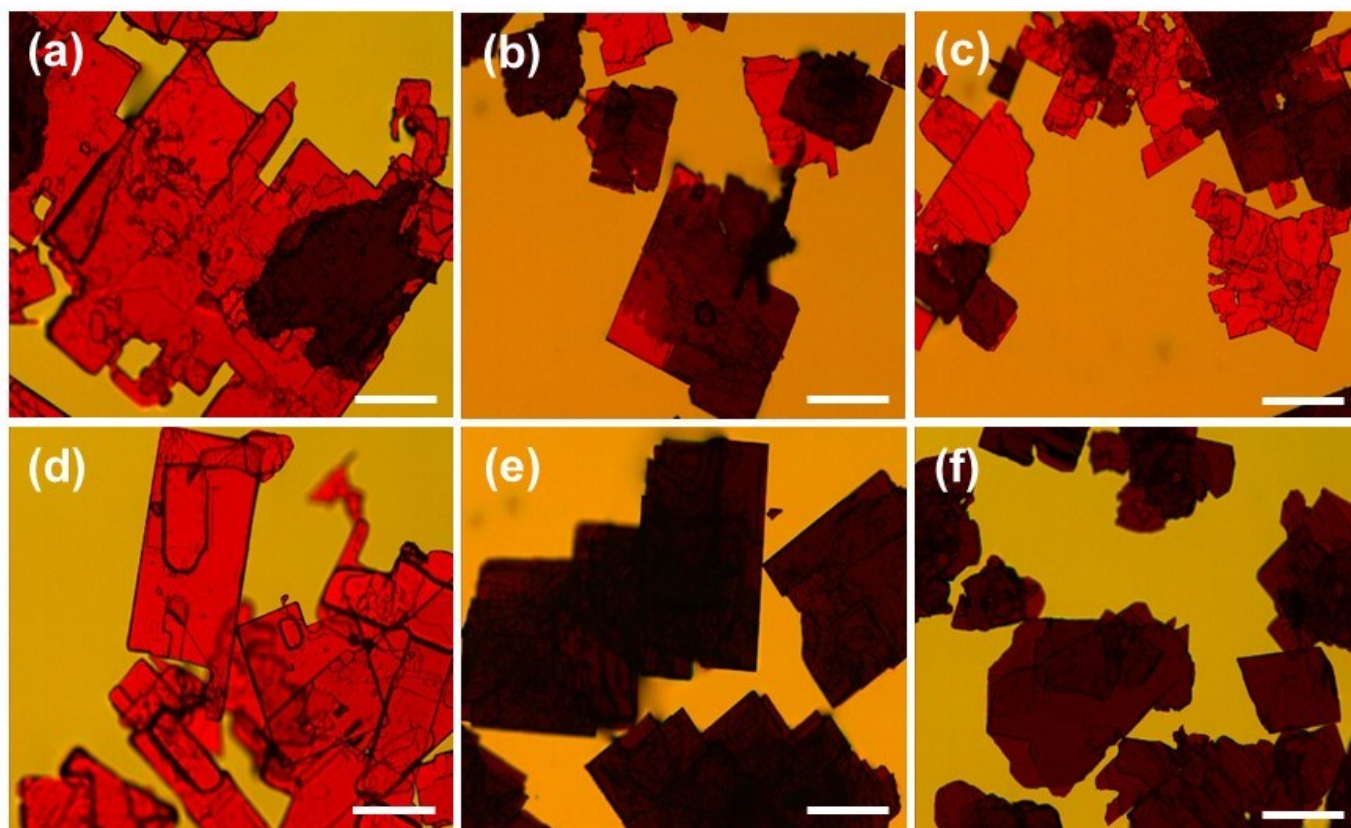

**Figure S2.** (a)  $(\text{HA})_2\text{MAPb}_2\text{I}_7$  ( $n = 2$ ) perovskite contaminated with  $(\text{HA})_2(\text{MA})_2\text{Pb}_3\text{I}_{10}$  ( $n = 3$ ) perovskite, (b-c)  $(\text{HA})_2(\text{MA})_2\text{Pb}_3\text{I}_{10}$  ( $n = 3$ ) compound contaminated with  $(\text{HA})_2\text{MAPb}_2\text{I}_7$  ( $n = 2$ ) perovskite, (d) pure  $(\text{HA})_2\text{MAPb}_2\text{I}_7$  ( $n = 2$ ) and (e-f)  $(\text{HA})_2(\text{MA})_2\text{Pb}_3\text{I}_{10}$  ( $n = 3$ ) perovskites. The scale bar is 100  $\mu\text{m}$ .

**Table S1.** Average and standard deviation of photovoltaic parameters for 25 perovskite solar cells based on (HA)<sub>2</sub>(MA)<sub>2</sub>Pb<sub>3</sub>I<sub>10</sub> perovskite.

| Device Number             | Jsc<br>[mA/cm <sup>2</sup> ] | Voc<br>[V]  | FF<br>[%]    | η<br>[%]    |
|---------------------------|------------------------------|-------------|--------------|-------------|
| 1                         | 12.339                       | 0.688       | 62.5         | 5.30        |
| 2                         | 12.679                       | 0.689       | 61.4         | 5.37        |
| 3                         | 11.772                       | 0.683       | 60.3         | 4.85        |
| 4                         | 12.219                       | 0.717       | 64.4         | 5.65        |
| 5                         | 13.610                       | 0.721       | 60.1         | 5.90        |
| 6                         | 12.053                       | 0.747       | 66.7         | 6.01        |
| 7                         | 11.775                       | 0.737       | 67.0         | 5.82        |
| 8                         | 12.539                       | 0.734       | 66.3         | 6.10        |
| 9                         | 12.073                       | 0.723       | 59.1         | 5.16        |
| 10                        | 12.827                       | 0.745       | 63.7         | 6.09        |
| 11                        | 13.064                       | 0.739       | 58.2         | 5.61        |
| 12                        | 12.355                       | 0.741       | 60.4         | 5.53        |
| 13                        | 12.444                       | 0.742       | 59.6         | 5.50        |
| 14                        | 12.801                       | 0.731       | 61.0         | 5.71        |
| 15                        | 12.738                       | 0.747       | 60.4         | 5.75        |
| 16                        | 12.447                       | 0.731       | 63.7         | 5.80        |
| 17                        | 12.527                       | 0.728       | 62.8         | 5.73        |
| 18                        | 12.179                       | 0.741       | 64.1         | 5.78        |
| 19                        | 12.263                       | 0.712       | 65.2         | 5.70        |
| 20                        | 11.851                       | 0.734       | 62.7         | 5.46        |
| 21                        | 11.962                       | 0.730       | 64.2         | 5.60        |
| 22                        | 13.907                       | 0.691       | 59.9         | 5.75        |
| 23                        | 14.013                       | 0.690       | 59.4         | 5.75        |
| 24                        | 13.455                       | 0.724       | 62.2         | 6.06        |
| 25                        | 11.592                       | 0.752       | 62.7         | 5.46        |
| <b>Average</b>            | <b>12.54</b>                 | <b>0.72</b> | <b>62.32</b> | <b>5.66</b> |
| <b>Standard deviation</b> | <b>0.65</b>                  | <b>0.02</b> | <b>2.49</b>  | <b>0.29</b> |
